## **Withdrawal statement**

### **Characterising Long Covid: a living systematic review update with controlled studies**

**Authors:** Melina Michelen,<sup>1,2</sup> Louise Sigfrid<sup>2</sup>, Christiana Kartsonaki<sup>3</sup>, Ian Shemilt<sup>4</sup>, Claire Hastie<sup>5</sup>, Margaret E. O'Hara<sup>5</sup>, Jake C. Suett<sup>6</sup>, Elisabeth A. Stelson<sup>7,8</sup>, Polina Bugaeva<sup>9</sup>, Dania T. Dahmash<sup>2</sup>, Ishmeala Rigby<sup>2</sup>, Daniel Munblit<sup>10,11,12</sup>, Eli Harriss<sup>13</sup>, Amanda Burls<sup>1</sup>, Vincent Cheng<sup>14</sup>, Janet T. Scott<sup>15</sup>, Gail Carson<sup>2</sup>, Piero Olliaro<sup>2</sup>, Charitini Stavropoulou<sup>1</sup>

1. School of Health and Psychological Sciences, City, University of London, London, UK
2. ISARIC Global Support Centre, Pandemic Sciences Institute, University of Oxford, Oxford, UK
3. Medical Research Council Population Health Research Unit (MRC PHRU), Nuffield Department of Population Health, University of Oxford, Oxford, UK
4. EPPI-Centre, UCL Social Research Institute, University College London, London, UK
5. Long Covid Support, London, UK
6. Queen Elizabeth Hospital, Kings Lynn, UK
7. Harvard T.H. Chan School of Public Health, Department of Social & Behavioral Sciences, Massachusetts, USA
8. Patient Led Research Collaborative, Washington DC, USA
9. Julius-Maximilians-Universität Würzburg, Würzburg, Germany
10. Department of Paediatrics and Paediatric Infectious Diseases, Institute of Child's Health, Sechenov First Moscow State Medical University (Sechenov University), Moscow, Russia
11. Inflammation, Repair and Development Section, National Heart and Lung Institute, Faculty of Medicine, Imperial College London, London, UK
12. Research and Clinical Center for Neuropsychiatry, Moscow, Russia
13. Bodleian Health Care Libraries, University of Oxford, Oxford, UK
14. Bristol Medical School, University of Bristol, Bristol, UK
15. MRC-University of Glasgow Centre for Virus Research, Glasgow, UK

#### **Statement:**

The authors have withdrawn their manuscript owing to a reporting error that we have identified in the conduct of this updated systematic review. On 7<sup>th</sup> March 2022 we made changes to the original protocol published in [F1000](#), to highlight the need to keep up with the evolving landscape of Covid-19 and Covid-19 research and focus on comparative, controlled studies. The revisions included also changes in data extraction and analysis that would be needed to do so. These changes were done in consultation with members of the Long COVID Support Group. However, we omitted to publicize these changes in an accessible, modified version of our protocol, and/or by updating our preregistered PROSPERO record (CRD42020211131) and [F1000 publication](#), prior to commencing and completing these stages of the process. In this manuscript, which reports the revised analyses, we have consequently also omitted to explicitly describe these changes as important deviations from the published protocol. Additionally, following rapid, sustained, and continuous growth in the conduct and reporting of eligible primary studies, it has become clear that, with or without the changes described above, we do not have sufficient capacity or resources to transition our baseline systematic review to being regularly updated using a living systematic review approach. Therefore, the authors do not wish this work to be cited as reference for the project. If you have any questions, please contact the corresponding author.
